# Supplementary material for: Cationic Liposomes Carrying siRNA: Impact of Lipid Composition on Physicochemical Properties, Cytotoxicity and Endosomal Escape
Source: PubMed Central journal article supplement (PMC5977284; doi:10.3390/nano8050270), 2018-04-24

**Supplementary data**

**Figure S1.** Polydispersity Index (PDI) of lipoplexes at different N/P molar ratios. Formulations DOTAP/Chol/DOPE 1/0.75/0.5, DOTAP/Chol/DOPE 1/0.5/0.5, DOTAP/DOPE 1/1 and DC-Chol/DOPE 1/1 were complexed to siCR at 100nM at N/P ratios of 0.5, 1.25, 2.5, 5, 7.5 and 10 (n=4).

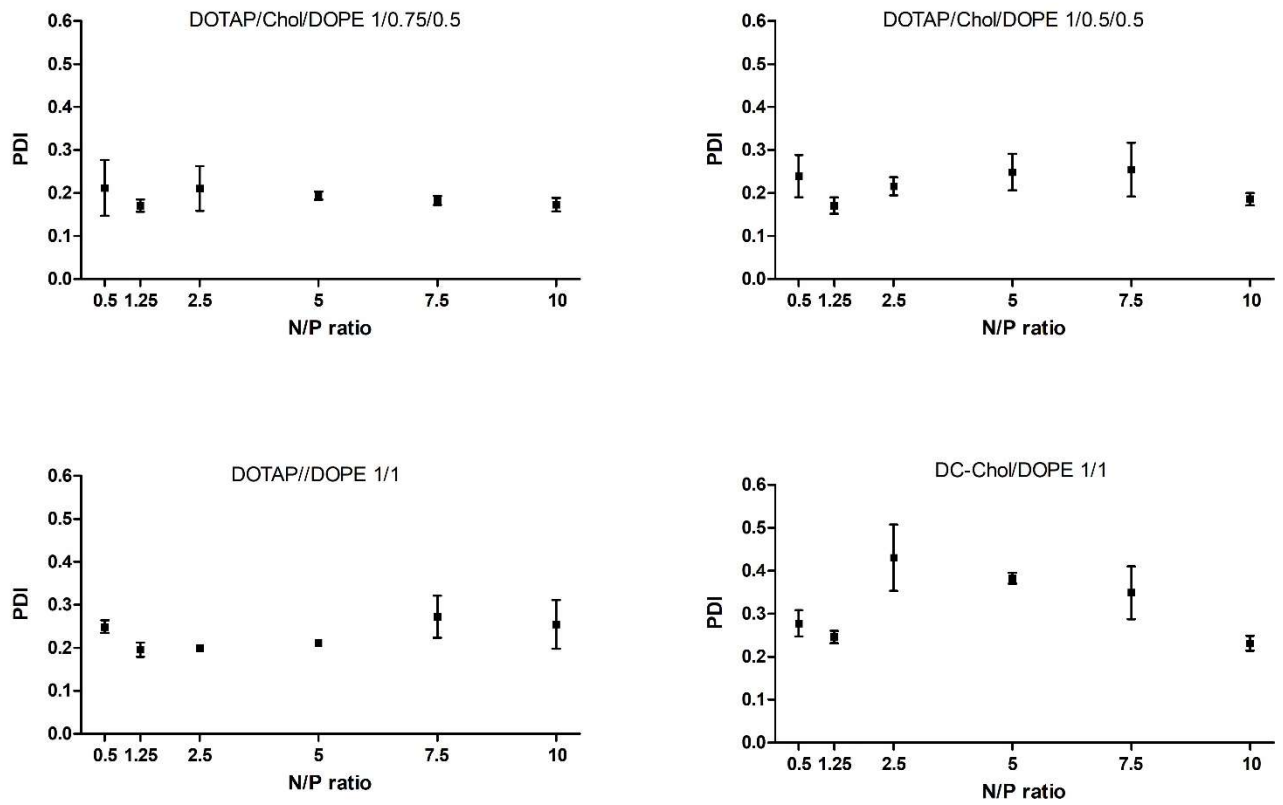

**Figure S2.** Cellular trafficking of lipoplexes on A549 cells, 4 hours post transfection. Mean fluorescence intensity (MFI) obtained after treatment with different formulations containing the siCR-FITC (40nM) by flow cytometry. Each condition is post-treated with Trypan Blue®. The dark line and percentage express the quantity of siRNA blocked outside of the cells (n =4).

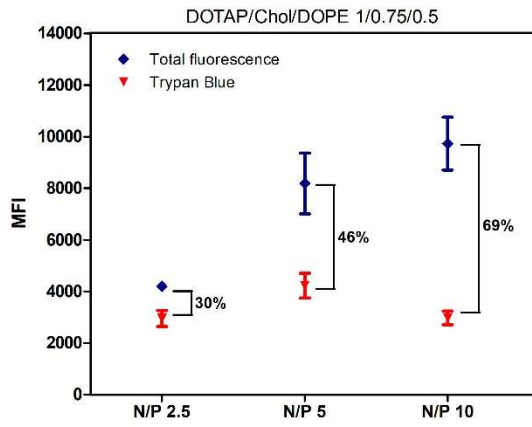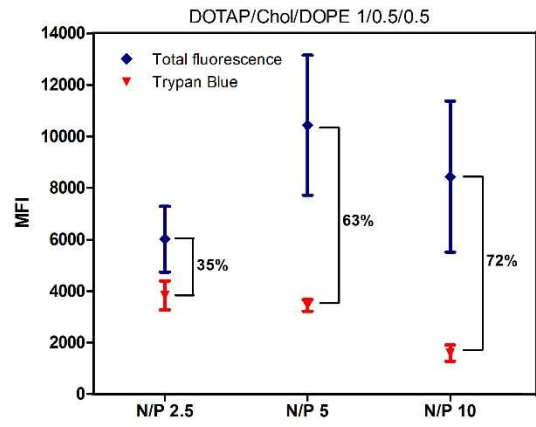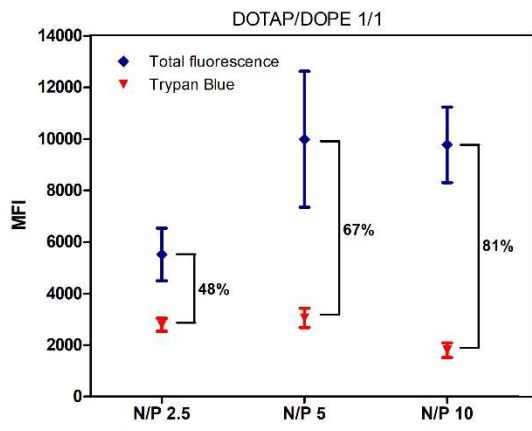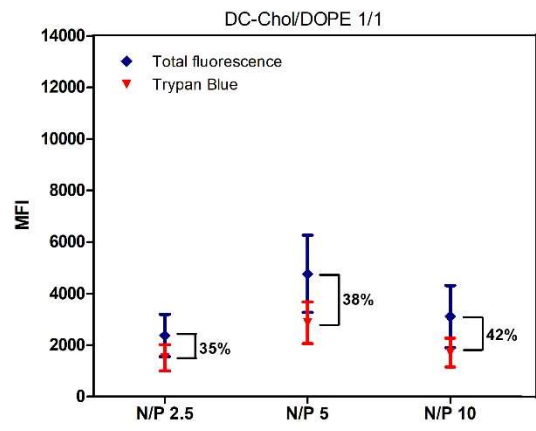

Supplement: nanomaterials-08-00270-s001.pdf [file nanomaterials-08-00270-s001.pdf]
